# Supplementary material for: Acquired resistance of pancreatic cancer cells to cisplatin is multifactorial with cell context-dependent involvement of resistance genes
Source: PubMed Central journal article supplement — Cancer Gene Ther. 2016 Dec 2;23(12):446–53. doi: 10.1038/cgt.2016.71 (PMC5159445; doi:10.1038/cgt.2016.71), 2016-12-02
Supplement: cgt201671x1.pdf [file cgt201671x1.pdf]

**Mezencev R. et al. Acquired resistance of pancreatic cancer cells to cisplatin is multifactorial with cell context-dependent involvement of resistance genes**

Supplementary Method

Total cellular RNA was isolated from AsPC1, AsPC1-R, BxPC3 and BxPC3-R cells cultured in drug-free RPMI 1640 medium with 10% FBS, 2 mM L-glutamine, penicillin (100 IU/mL), streptomycin (100 µg/mL) and amphotericin B (0.25 µg/mL) using the RNeasy Mini Kit (Qiagen, Valencia, CA). Purity and concentration of total cell RNA were determined with NanoDrop 1000 Spectrophotometer (Thermo Scientific, Wilmington, DE). RNA specimens were processed with a DNA-free kit (Ambion/ThermoFisher Scientific, Waltham, MA) to remove contaminating DNA and reverse-transcribed using the High Capacity cDNA Reverse Transcription Kit with RNase Inhibitor (Applied Biosystems/ThermoFisher Scientific). qPCR was performed using the CFX96 Real Time PCR Detection System (BioRad, Hercules, CA) using TaqMan assays Hs00156548\_m1 for CLU, Hs01012158\_m1 for ERCC1, Hs00765553\_m1 for CCND1, Hs02758991\_g1 for GAPDH and Hs99999903\_m1 for ACTB and TaqMan Universal Master Mix II with UNG (all from Applied Biosystems/ThermoFisher Scientific) following the manufacturer's recommendations. All qPCR reactions were performed in triplicate. Threshold cycles (Ct) were determined using single threshold/baseline subtracted curve fit (CFX Manager Software) and averaged across replicates. Fold changes (FC) of expression between resistant and parental cells were determined using the  $\Delta\Delta C_t$  method. GAPDH and ACTB were selected as internal controls for AsPC1/AsPC1-R and BxPC3/BxPC3-R cells, respectively, based on microarray data. Standard deviations of FC were calculated using error propagation. Statistical significance of differences among mean  $\Delta C_t$  values was tested using a two-tailed t-test with Welch's correction. The differences between means were considered significant for  $p < 0.05$ .

Supplementary Results

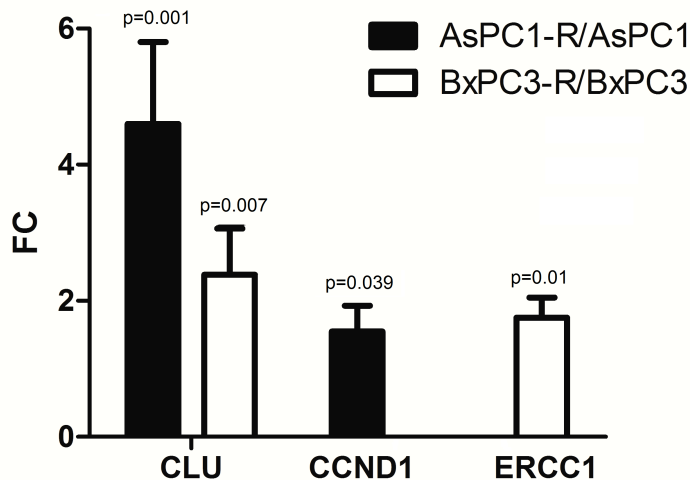

FC: Fold change between resistant and parental cells

Supplementary Figures

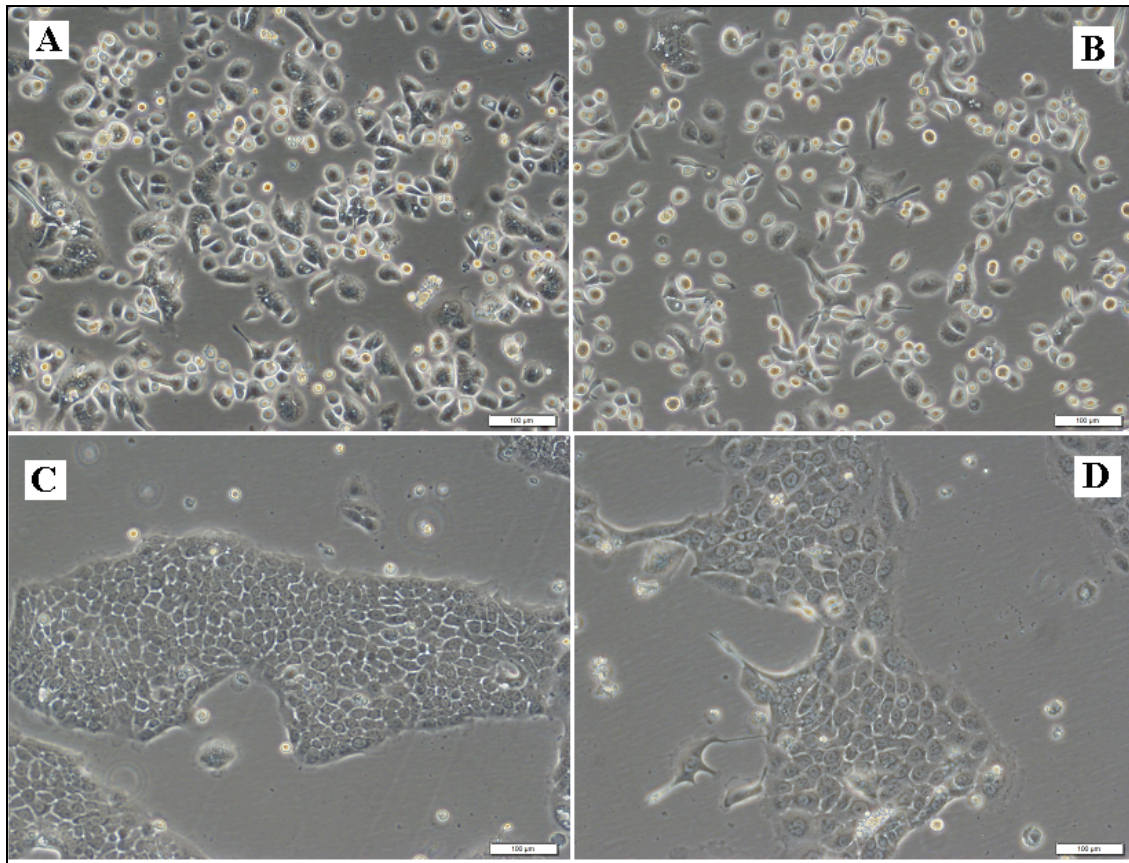

**Fig. S1. Morphology of cells in culture examined by phase-contrast microscopy.** (A) AsPC1; (B) AsPC1-R; (C) BxPC3; (D) BxPC3-R; magnification = 100 ×; scale bar = 100 µm

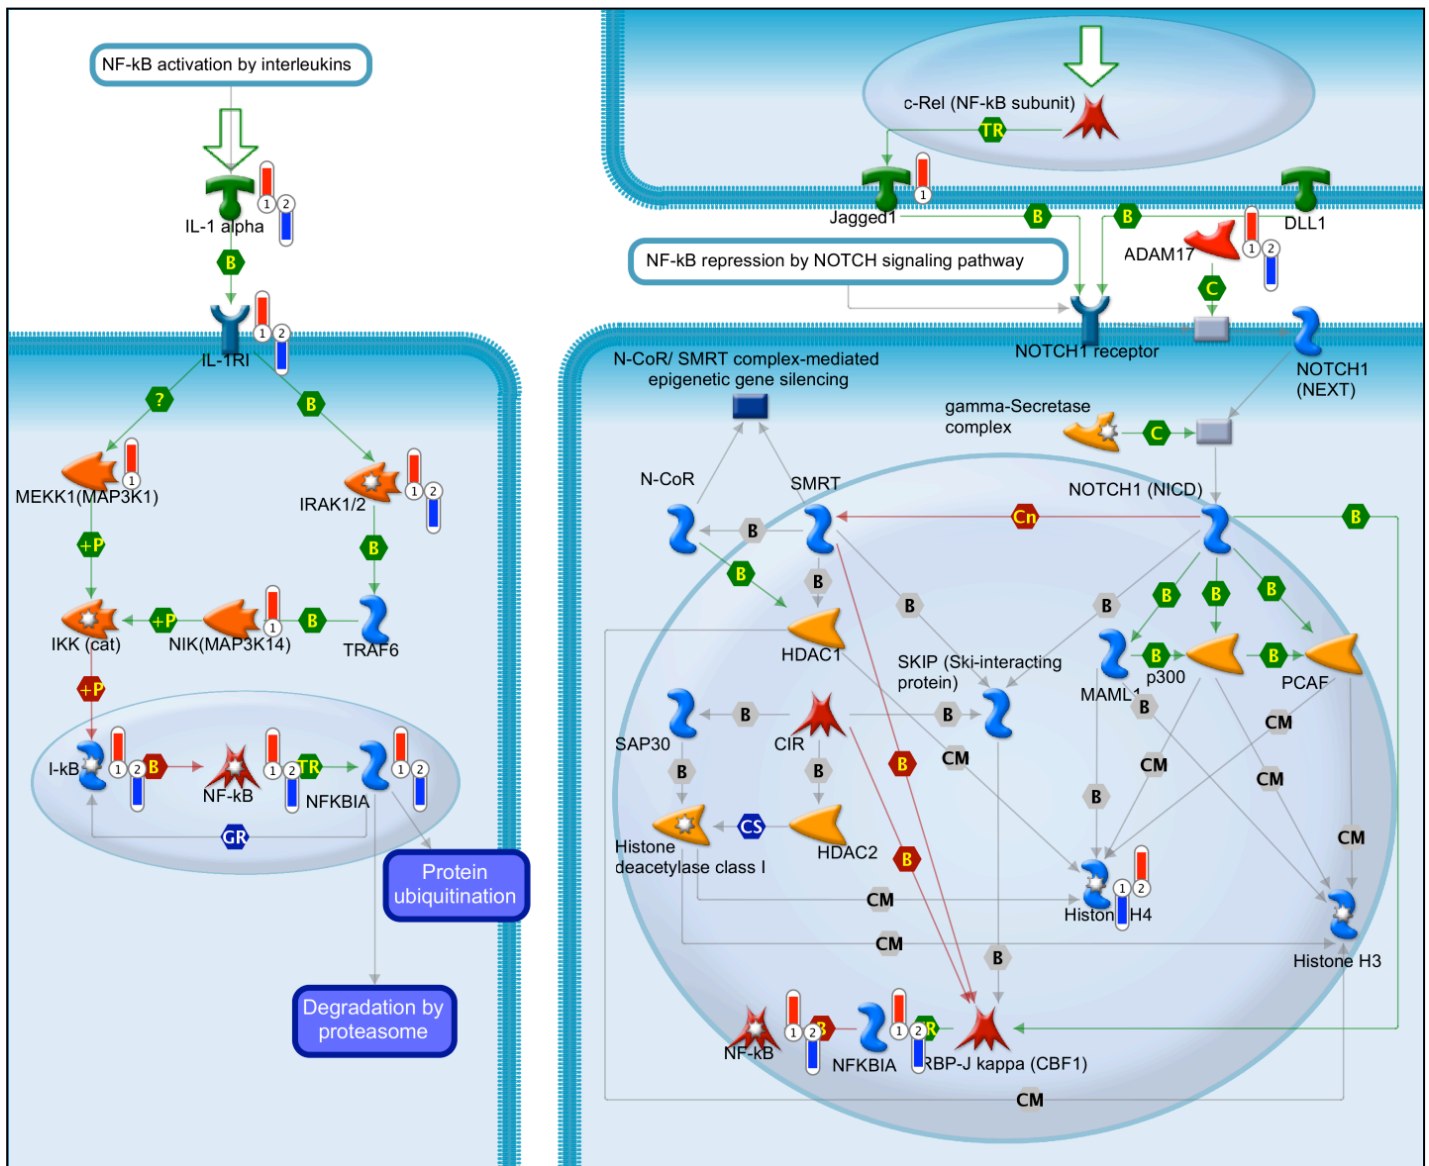

**Fig. S2. MetaCore Development\_NOTCH1-mediated pathway for NF-κB activity modulation.** 1 = AsPC1-R vs AsPC1 cells; 2 = BxPC3-R vs BxPC3 cells; Red thermometer: gene is overexpressed; Blue thermometer: gene under-expressed in resistant cells. For legend see <https://portal.genego.com/legends/MetaCoreQuickReferenceGuide.pdf>



enriched in parental phenotype; Edges: connect significantly overlapping gene sets (width reflects degree of the overlap).

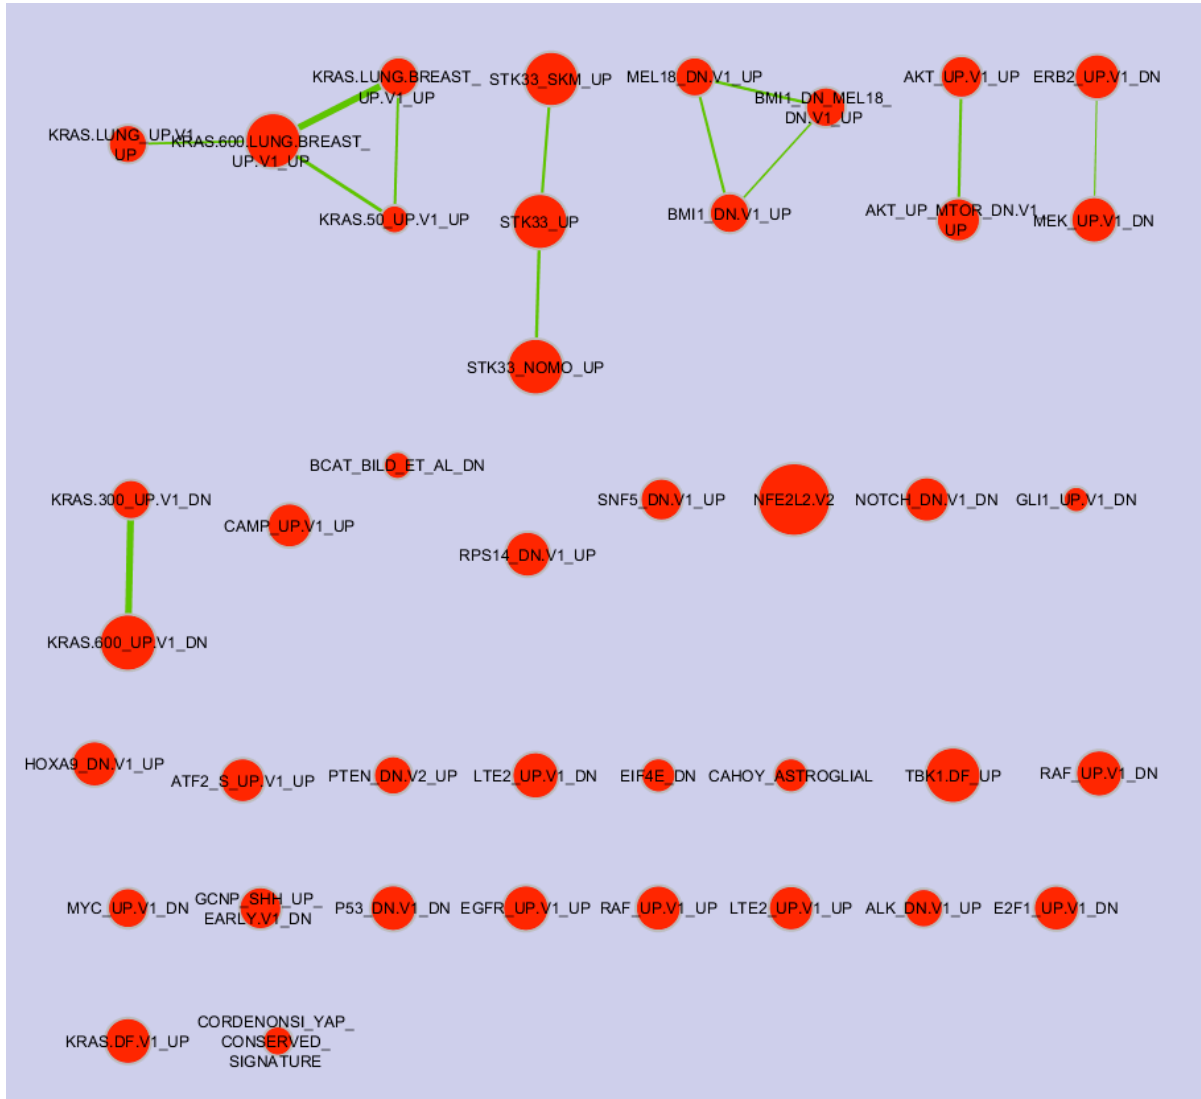

**Fig. S5. Enrichment Map visualizing results of GSEA analysis for AsPC1-R/AsPC1 cells; Oncogenic Signatures gene set.** Gene set: Oncogenic Signatures (189 gene sets) (<http://www.broadinstitute.org/gsea/msigdb/collections.jsp>); Nodes: gene sets; Node size: number of genes in the gene set; Node color: red = enriched in resistant phenotype; blue = enriched in parental phenotype; Edges: connect significantly overlapping gene sets (width reflects degree of the overlap).

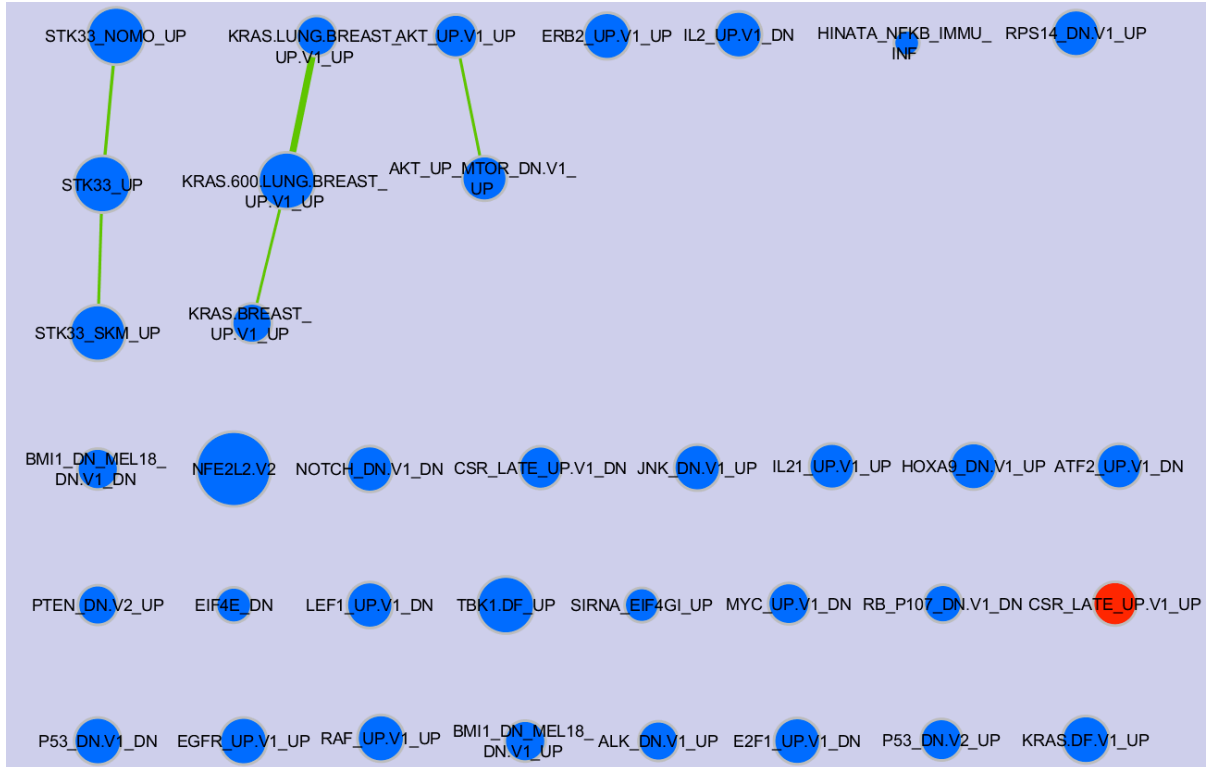

**Fig. S6. Enrichment Map visualizing results of GSEA analysis for BxPC3-R/BxPC3 cells; Oncogenic Signatures gene set.** Gene set: Oncogenic Signatures (189 gene sets) (<http://www.broadinstitute.org/gsea/msigdb/collections.jsp>); Nodes: gene sets; Node size: number of genes in the gene set; Node color: red = enriched in resistant phenotype; blue = enriched in parental phenotype; Edges: connect significantly overlapping gene sets (width reflects degree of the overlap).

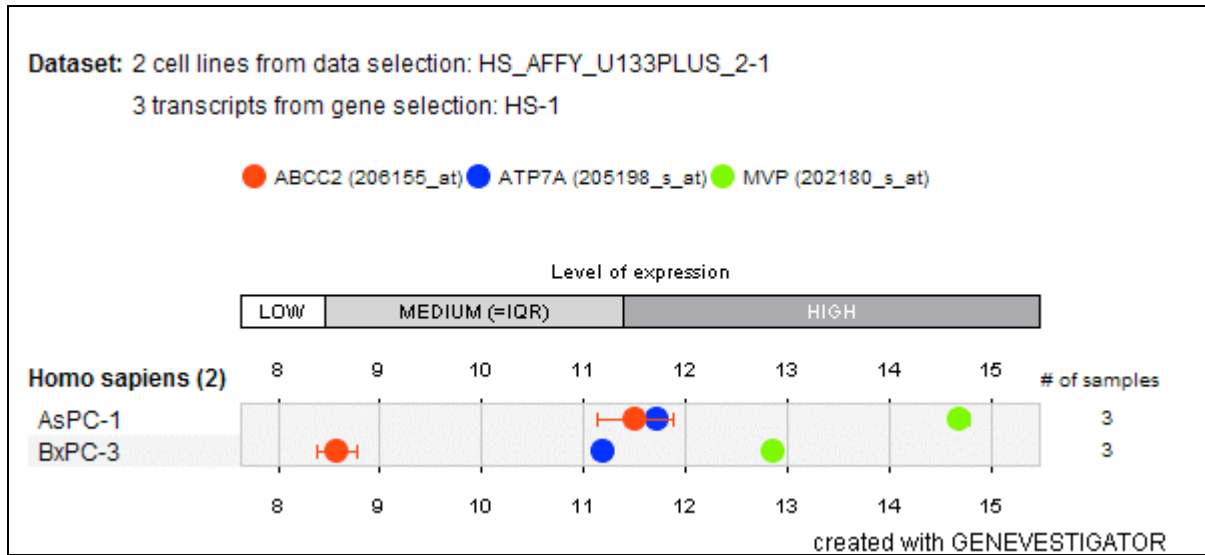

**Fig. S7.** Normalized expression signals for ABCC2, ATP7A and MVP genes in AsPC1 and BxPC3 cell lines processed from the GSE22973 dataset (Gene Expression Omnibus; [www.ncbi.nlm.nih.gov/geo](http://www.ncbi.nlm.nih.gov/geo)). The data were processed and image generated using the Genevestigator 5-11-02, Release Date 07/26/2016 [1].

[1] Hruz, T.; Laule, O.; Szabo, G.; Wessendorp, F.; Bleuler, S.; Oertle, L.; Widmayer, P.; Gruissem, W.; Zimmermann, P. Genevestigator v3: a reference expression database for the meta-analysis of transcriptomes. *Advances in bioinformatics*, **2008**, *2008*, 420747.

## Supplementary Tables

**Table S1. List of 72 cisplatin resistance-related genes [1-6]**

| CISPLATIN-RESISTANCE RELATED GENES |        |          |          |       |        |         |       |
|------------------------------------|--------|----------|----------|-------|--------|---------|-------|
| ABCC1                              | CCND1  | ERCC2    | HMGB1    | MARK2 | NFE2L2 | RPL27   | XPA   |
| ABCC2                              | CD44   | ERCC4    | HSP90AA1 | MLH1  | NQO1   | RPL36   | XRCC1 |
| ADM                                | CFLAR  | GCLC     | HSPA1A   | MPO   | PGK1   | RPL36A  |       |
| ATP7A                              | CHEK1  | GCLM     | HSPA1B   | MSH2  | POLB   | SIRT1   |       |
| ATP7B                              | CHEK2  | GGT1     | HSPB1    | MSH6  | POLH   | SLC31A1 |       |
| BCL2                               | CITED2 | GLUT1    | HSPD1    | MT1A  | PTGS2  | SLC31A2 |       |
| BCL2A1                             | CLU    | GSTM1    | HSPE1    | MT2A  | PTPN21 | SOD1    |       |
| BCL2L1                             | DHDH   | GSTP1    | KAT2B    | MVD   | RAB8   | TMEM205 |       |
| BIRC3                              | EHD1   | GSTT2    | KAT5     | MVP   | RAD51  | TOP2A   |       |
| CABIN1                             | ERCC1  | HIST1H1A | LRRFIP1  | NAPA  | REV1   | XIAP    |       |

## References

- [1] Chao, C.C.-K. A search for the genes involved in the resistance to cisplatin chemotherapy: Review of the experimental evidence. *Current Topics in Pharmacology*, **2010**, *14*.
- [2] Shen, D.W.; Pouliot, L.M.; Hall, M.D.; Gottesman, M.M. Cisplatin resistance: a cellular self-defense mechanism resulting from multiple epigenetic and genetic changes. *Pharmacol Rev*, **2012**, *64* (3), 706-721.
- [3] Siddik, Z.H., Cisplatin Resistance. Molecular Basis of Multifaceted Impediment. In: *Cancer Drug Discovery and Development*; Teicher, B., Ed. Humana Press, Inc.: Totowa, NJ, **2006**; pp 283-307.
- [4] Djeu, J.Y.; Wei, S. Clusterin and chemoresistance. *Adv Cancer Res*, **2009**, *105*, 77-92.
- [5] Stewart, D.J. Mechanisms of resistance to cisplatin and carboplatin. *Crit Rev Oncol Hematol*, **2007**, *63* (1), 12-31.
- [6] Fujimori, S.; Abe, Y.; Nishi, M.; Hamamoto, A.; Inoue, Y.; Ohnishi, Y.; Nishime, C.; Matsumoto, H.; Yamazaki, H.; Kijima, H.; Ueyama, Y.; Inoue, H.; Nakamura, M. The subunits of glutamate cysteine ligase enhance cisplatin resistance in human non-small cell lung cancer xenografts in vivo. *Int J Oncol*, **2004**, *25* (2), 413-418.

**Table S2. Properties of pancreatic ductal adenocarcinoma cell lines selected for the development of cisplatin-resistant cells (reviewed in [1])**

|                                                                                     | <b>AsPC1</b>                                                                                                       | <b>BxPC3</b>                                                                                                                                              |
|-------------------------------------------------------------------------------------|--------------------------------------------------------------------------------------------------------------------|-----------------------------------------------------------------------------------------------------------------------------------------------------------|
| <b>Origin</b><br>Specimen for cell isolation<br>Patient<br>Diagnosis<br><br>Grading | Ascites<br>Female, 62 yr<br>Metastatic adeno-<br>carcinoma of the head of<br>pancreas<br><br>Poorly differentiated | Primary tumor tissue<br>Female, 61 yr<br>Adenocarcinoma of the<br>body of pancreas,<br>metastasis not found<br><br>Moderately to poorly<br>differentiated |
| <b>Genotype</b><br>K-Ras<br>TP53<br>CDKN2A                                          | Mut<br>Mut<br>WT                                                                                                   | WT<br>Mut<br>WT                                                                                                                                           |
| <b>Phenotype</b><br>Cell line doubling time<br>COX2 expression<br>VEGF expression   | 38-40 hrs<br>Low<br>Low                                                                                            | 48-60 hrs<br>High<br>High                                                                                                                                 |

## References

- [1] Deer, E.L.; Gonzalez-Hernandez, J.; Coursen, J.D.; Shea, J.E.; Ngatia, J.; Scaife, C.L.; Firpo, M.A.; Mulvihill, S.J. Phenotype and genotype of pancreatic cancer cell lines. *Pancreas*, **2010**, *39* (4), 425-435.



**Table S3. MetaCore Pathway Maps enriched by genes up regulated in AsPC1-R vs AsPC1 cells**

| #  | Maps                                                                  | Total | In Data | p-value   | FDR       |
|----|-----------------------------------------------------------------------|-------|---------|-----------|-----------|
| 1  | Immune response_Alternative complement pathway                        | 34    | 16      | 5.754E-10 | 4.269E-07 |
| 2  | Immune response_Signaling pathway mediated by IL-6 and IL-1           | 29    | 11      | 4.288E-06 | 6.471E-04 |
| 3  | Cell adhesion_Chemokines and adhesion                                 | 86    | 20      | 4.351E-06 | 6.471E-04 |
| 4  | Complement pathway disruption in thrombotic microangiopathy           | 24    | 10      | 4.361E-06 | 6.471E-04 |
| 5  | Development_NOTCH1-mediated pathway for NF-KB activity modulation     | 30    | 11      | 6.315E-06 | 7.810E-04 |
| 6  | Immune response_Classical complement pathway                          | 43    | 13      | 1.051E-05 | 9.748E-04 |
| 7  | Immune response_Lectin induced complement pathway                     | 42    | 12      | 4.348E-05 | 3.226E-03 |
| 8  | Immune response_IL-1 signaling pathway                                | 39    | 11      | 1.036E-04 | 6.405E-03 |
| 9  | Cell adhesion_ECM remodeling                                          | 48    | 12      | 1.802E-04 | 9.552E-03 |
| 10 | Signal transduction_NF-kB activation pathways                         | 42    | 11      | 2.148E-04 | 1.063E-02 |
| 11 | IGF family signaling in colorectal cancer                             | 51    | 12      | 3.332E-04 | 1.448E-02 |
| 12 | Mucin expression in CF airways                                        | 44    | 11      | 3.351E-04 | 1.448E-02 |
| 13 | Immune response_IL-33 signaling pathway                               | 45    | 11      | 4.138E-04 | 1.616E-02 |
| 14 | Immune response_TLR5, TLR7, TLR8 and TLR9 signaling pathways          | 39    | 10      | 5.015E-04 | 1.637E-02 |
| 15 | Immune response_HSP60 and HSP70/ TLR signaling pathway                | 46    | 11      | 5.075E-04 | 1.637E-02 |
| 16 | Immune response_MIF-induced cell adhesion, migration and angiogenesis | 40    | 10      | 6.242E-04 | 1.838E-02 |
| 17 | Main growth factor signaling cascades in multiple myeloma cells       | 35    | 9       | 9.361E-04 | 2.481E-02 |
| 18 | Immune response_Bacterial infections in normal airways                | 36    | 9       | 1.166E-03 | 2.704E-02 |
| 19 | Immune response_Histamine H1 receptor signaling in immune response    | 37    | 9       | 1.439E-03 | 3.236E-02 |
| 20 | Immune response_IL-18 signaling                                       | 53    | 11      | 1.788E-03 | 3.492E-02 |

Total: total number of MetaCore network objects in a given MetaCore Map;

In Data: number of MetaCore network objects corresponding to differentially expressed genes; p-values are calculated based on hypergeometric distribution; FDR: false discovery rate.

**Table S4. MetaCore Pathway Maps enriched by genes up regulated in BxPC3-R vs BxPC3 cells**

| # | Maps                                                                                     | Total | In Data | p-value   | FDR       |
|---|------------------------------------------------------------------------------------------|-------|---------|-----------|-----------|
| 1 | Transport_cAMP/ Ca(2+)-dependent Insulin secretion                                       | 18    | 5       | 3.195E-04 | 9.387E-02 |
| 2 | Signal transduction_cAMP signaling                                                       | 29    | 6       | 4.514E-04 | 9.387E-02 |
| 3 | Cytoskeleton remodeling_Keratin filaments                                                | 30    | 6       | 5.478E-04 | 9.387E-02 |
| 4 | Development_Thromboxane A2 signaling pathway                                             | 32    | 6       | 7.881E-04 | 9.387E-02 |
| 5 | Regulation of lipid metabolism_Regulation of lipid metabolism by niacin and isoprenaline | 24    | 5       | 1.333E-03 | 9.387E-02 |
| 6 | NETosis in SLE                                                                           | 25    | 5       | 1.618E-03 | 9.387E-02 |

Total: total number of MetaCore network objects in a given MetaCore Map;

In Data: number of MetaCore network objects corresponding to differentially expressed genes; p-values are calculated based on hypergeometric distribution; FDR: false discovery rate.

**Table S5. MetaCore Pathway Maps enriched by genes down regulated in AsPC1-R vs. AsPC1 cells**

| #  | Maps                                                                                  | Total | In Data | p-value   | FDR       |
|----|---------------------------------------------------------------------------------------|-------|---------|-----------|-----------|
| 1  | Regulation of lipid metabolism_Regulation of lipid metabolism via LXR, NF-Y and SREBP | 29    | 9       | 5.339E-07 | 3.283E-04 |
| 2  | Protein folding and maturation_Angiotensin system maturation \ Human version          | 26    | 8       | 2.540E-06 | 5.208E-04 |
| 3  | Transcription_Sirtuin6 regulation and functions                                       | 55    | 11      | 3.555E-06 | 5.466E-04 |
| 4  | Development_Role of IL-8 in angiogenesis                                              | 49    | 9       | 5.807E-05 | 7.142E-03 |
| 5  | Cell cycle_Initiation of mitosis                                                      | 24    | 6       | 1.772E-04 | 1.816E-02 |
| 6  | NETosis in SLE                                                                        | 25    | 6       | 2.261E-04 | 1.986E-02 |
| 7  | Reproduction_Progesterone-mediated oocyte maturation                                  | 28    | 6       | 4.387E-04 | 3.372E-02 |
| 8  | Reproduction_GnRH signaling                                                           | 53    | 8       | 6.167E-04 | 4.214E-02 |
| 9  | Adiponectin in pathogenesis of type 2 diabetes                                        | 21    | 5       | 8.060E-04 | 4.957E-02 |
| 10 | Development_Delta- and kappa-type opioid receptors signaling via beta-arrestin        | 22    | 5       | 1.012E-03 | 5.660E-02 |

Total: total number of MetaCore network objects in a given MetaCore Map;

In Data: number of MetaCore network objects corresponding to differentially expressed genes; p-values are calculated based on hypergeometric distribution; FDR: false discovery rate .

**Table S6. MetaCore Pathway Maps enriched by genes down regulated in BxPC3-R vs. BxPC3 cells**

| #  | Maps                                                                                     | Total | In Data | p-value   | FDR       |
|----|------------------------------------------------------------------------------------------|-------|---------|-----------|-----------|
| 1  | Immune response_HMGB1/RAGE signaling pathway                                             | 44    | 15      | 5.386E-07 | 2.332E-04 |
| 2  | Immune response_Alternative complement pathway                                           | 34    | 13      | 6.884E-07 | 2.332E-04 |
| 3  | Immune response_HSP60 and HSP70/ TLR signaling pathway                                   | 46    | 15      | 1.036E-06 | 2.332E-04 |
| 4  | Impaired inhibitory action of lipoxins and Resolvin E1 on neutrophil functions in CF     | 21    | 10      | 1.244E-06 | 2.332E-04 |
| 5  | Immune response_IL-17 signaling pathways                                                 | 49    | 15      | 2.565E-06 | 3.847E-04 |
| 6  | Immune response_MIF-mediated glucocorticoid regulation                                   | 19    | 9       | 4.602E-06 | 5.752E-04 |
| 7  | Complement pathway disruption in thrombotic microangiopathy                              | 24    | 10      | 5.581E-06 | 5.980E-04 |
| 8  | Immune response_IL-18 signaling                                                          | 53    | 15      | 7.606E-06 | 7.131E-04 |
| 9  | Immune response_Role of PKR in stress-induced antiviral cell response                    | 49    | 14      | 1.364E-05 | 1.061E-03 |
| 10 | Th17 cells in CF                                                                         | 43    | 13      | 1.415E-05 | 1.061E-03 |
| 11 | Immune response_C3a signaling                                                            | 32    | 11      | 1.683E-05 | 1.148E-03 |
| 12 | Immune response_TLR5, TLR7, TLR8 and TLR9 signaling pathways                             | 39    | 12      | 2.498E-05 | 1.561E-03 |
| 13 | Immune response_Lipoxins and Resolvin E1 inhibitory action on neutrophil functions       | 18    | 8       | 2.864E-05 | 1.652E-03 |
| 14 | Signal transduction_Soluble CXCL16 signaling                                             | 34    | 11      | 3.234E-05 | 1.732E-03 |
| 15 | Immune response_CD40 signaling                                                           | 47    | 13      | 4.075E-05 | 2.038E-03 |
| 16 | Immune response_Bacterial infections in normal airways                                   | 36    | 11      | 5.885E-05 | 2.759E-03 |
| 17 | Immune response_TSLP signalling                                                          | 32    | 10      | 1.038E-04 | 4.327E-03 |
| 18 | Immune response_Substance P-stimulated expression of proinflammatory cytokines via MAPKs | 32    | 10      | 1.038E-04 | 4.327E-03 |
| 19 | Bacterial infections in CF airways                                                       | 33    | 10      | 1.388E-04 | 5.478E-03 |
| 20 | Immune response_TLR2 and TLR4 signaling pathways                                         | 47    | 12      | 1.878E-04 | 7.044E-03 |
| 21 | Development_PEDF signaling                                                               | 35    | 10      | 2.388E-04 | 8.528E-03 |
| 22 | Signal transduction_NF-kB activation pathways                                            | 42    | 11      | 2.731E-04 | 9.311E-03 |
| 23 | Immune response_C5a signaling                                                            | 38    | 10      | 4.971E-04 | 1.564E-02 |
| 24 | Immune response_Antigen presentation by MHC class II                                     | 10    | 5       | 5.215E-04 | 1.564E-02 |
| 25 | Immune response_IL-33 signaling pathway                                                  | 45    | 11      | 5.230E-04 | 1.564E-02 |
| 26 | Immune response_Role of HMGB1 in dendritic cell maturation and migration                 | 20    | 7       | 5.421E-04 | 1.564E-02 |
| 27 | Immune response_IL-1 signaling pathway                                                   | 39    | 10      | 6.229E-04 | 1.710E-02 |
| 28 | Inhibition of neutrophil migration by proresolving lipid mediators in COPD               | 46    | 11      | 6.401E-04 | 1.710E-02 |
| 29 | IL-17-induced mucin expression in CF airways                                             | 33    | 9       | 7.154E-04 | 1.710E-02 |
| 30 | Immune response_MIF-induced cell adhesion, migration and angiogenesis                    | 40    | 10      | 7.738E-04 | 1.710E-02 |
| 31 | Development_TGF-beta-dependent induction of                                              | 40    | 10      | 7.738E-04 | 1.710E-02 |

|    |                                                                                            |    |    |           |           |
|----|--------------------------------------------------------------------------------------------|----|----|-----------|-----------|
|    | EMT via MAPK                                                                               |    |    |           |           |
| 32 | Immune response_T regulatory cell-mediated modulation of antigen-presenting cell functions | 40 | 10 | 7.738E-04 | 1.710E-02 |
| 33 | Fructose metabolism/ Rodent version                                                        | 27 | 8  | 7.753E-04 | 1.710E-02 |
| 34 | Fructose metabolism                                                                        | 27 | 8  | 7.753E-04 | 1.710E-02 |
| 35 | PDE4 regulation of cyto/chemokine expression in arthritis                                  | 34 | 9  | 9.070E-04 | 1.944E-02 |
| 36 | TLR2-induced platelet activation                                                           | 22 | 7  | 1.040E-03 | 2.166E-02 |
| 37 | Development_Role of IL-8 in angiogenesis                                                   | 49 | 11 | 1.129E-03 | 2.289E-02 |
| 38 | Glycolysis and gluconeogenesis p. 1                                                        | 17 | 6  | 1.308E-03 | 2.581E-02 |

Total: total number of MetaCore network objects in a given MetaCore Map;

In Data: number of MetaCore network objects corresponding to differentially expressed genes;

p-values are calculated based on hypergeometric distribution; FDR: false discovery rate
